# Supplementary material for: Partitioning variability in animal behavioral videos using semi-supervised variational autoencoders
Source: PubMed Central journal article supplement (PMC8489729; doi:10.1371/journal.pcbi.1009439), 2021-09-22

**A**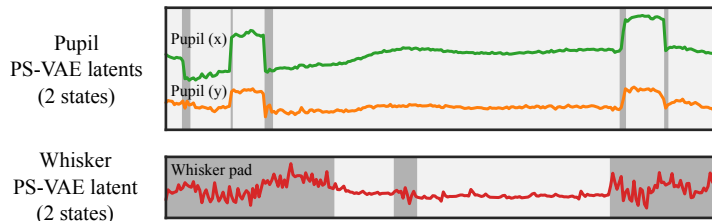**B**

Combinatorial PS-VAE states (4 states)

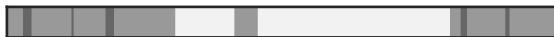**C**

Combined PS-VAE latents (4 states)

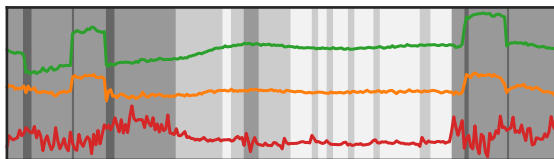**E**

VAE latents (4 states)

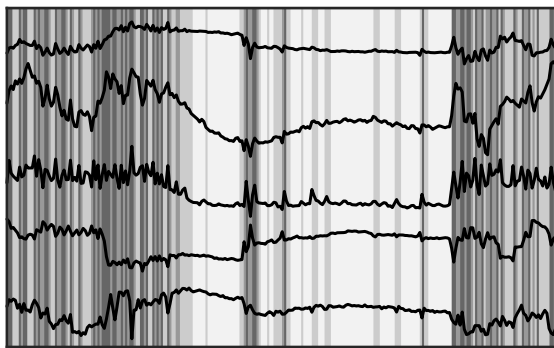

0

4

8

Time (s)

Mouse face dataset

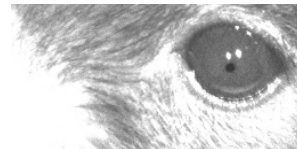**D**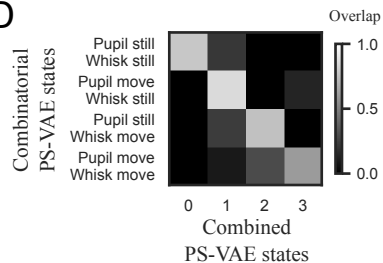**F**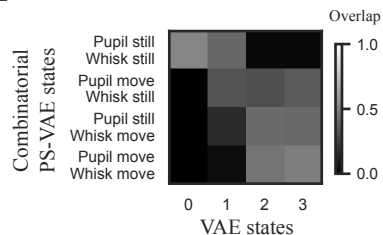

Supplement: pcbi.1009439.s003.pdf [file pcbi.1009439.s003.pdf]
