# Supplementary material for: Partitioning variability in animal behavioral videos using semi-supervised variational autoencoders
Source: PubMed Central journal article supplement (PMC8489729; doi:10.1371/journal.pcbi.1009439), 2021-09-22

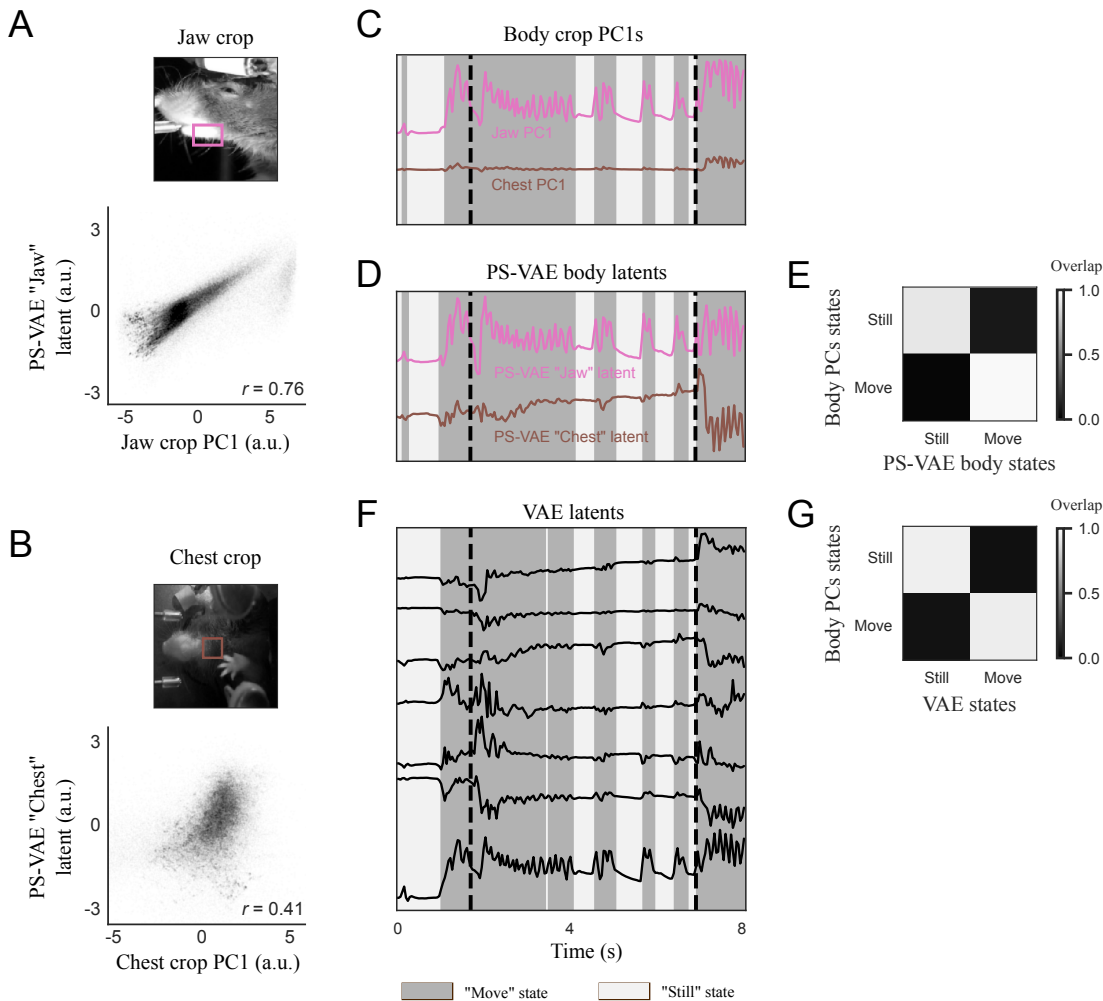

Supplement: pcbi.1009439.s004.pdf [file pcbi.1009439.s004.pdf]
