# Supplementary material for: Partitioning variability in animal behavioral videos using semi-supervised variational autoencoders
Source: PubMed Central journal article supplement (PMC8489729; doi:10.1371/journal.pcbi.1009439), 2021-09-22

**A**

Paw  
PS-VAE latent  
(2 states)

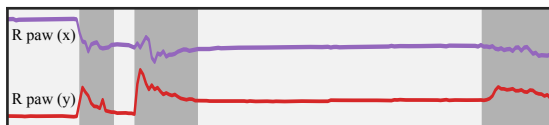

Body  
PS-VAE latents  
(2 states)

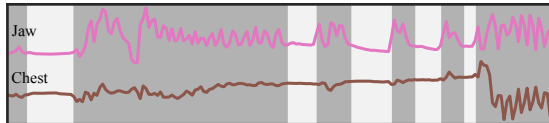**B**

Combinatorial  
PS-VAE states  
(4 states)

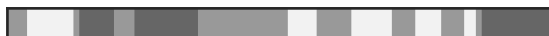**C**

Combined  
PS-VAE latents  
(4 states)

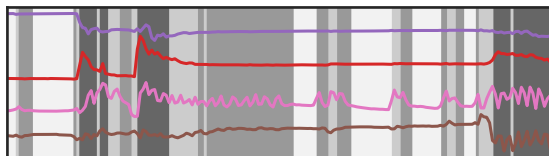**E**

VAE latents  
(4 states)

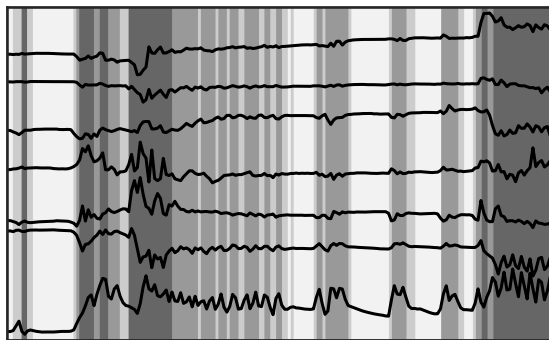

0 2 4 6  
Time (s)

Two-view dataset

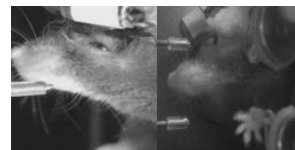**D**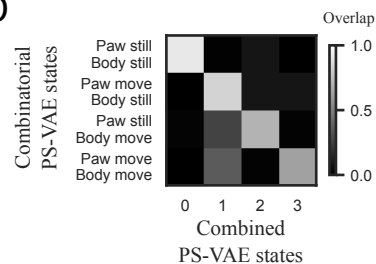**F**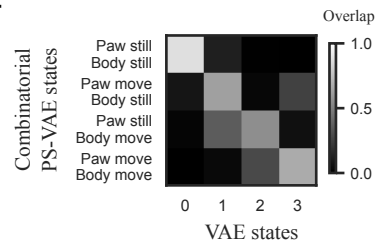

Supplement: pcbi.1009439.s005.pdf [file pcbi.1009439.s005.pdf]
