# Supplementary material for: Partitioning variability in animal behavioral videos using semi-supervised variational autoencoders
Source: PubMed Central journal article supplement (PMC8489729; doi:10.1371/journal.pcbi.1009439), 2021-09-22

A

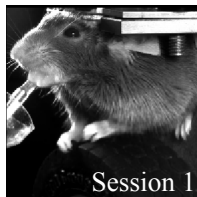

— True  
 — MSPS-VAE  
 — VAE

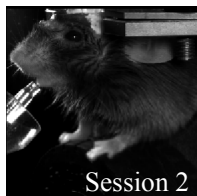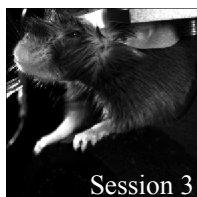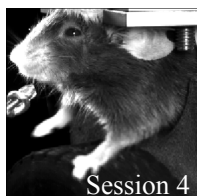

B

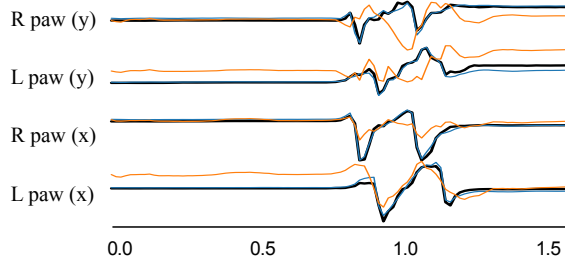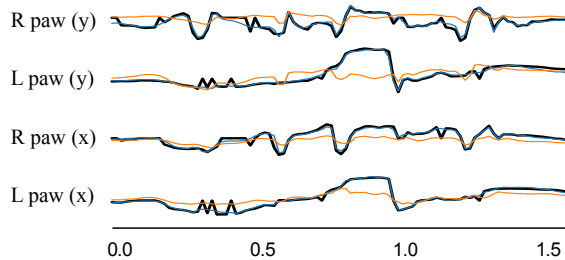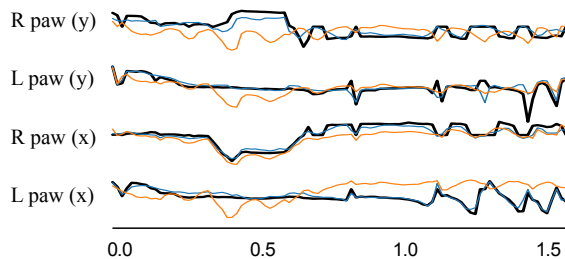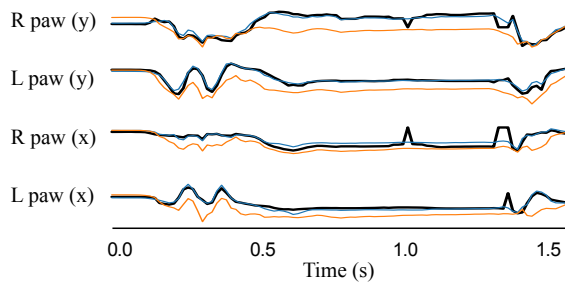

C

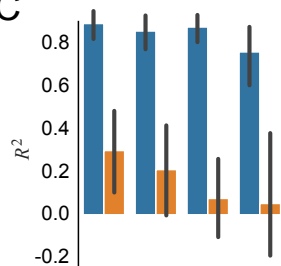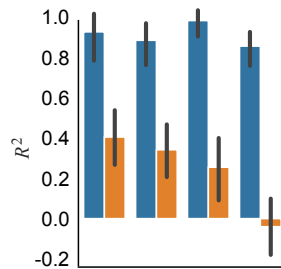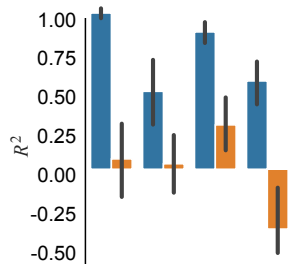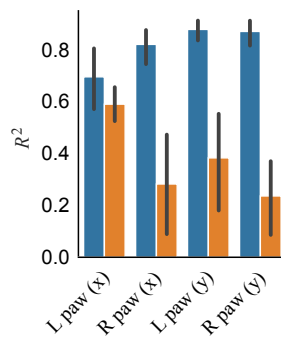

Supplement: pcbi.1009439.s009.pdf [file pcbi.1009439.s009.pdf]
