# Supplementary material for: Partitioning variability in animal behavioral videos using semi-supervised variational autoencoders
Source: PubMed Central journal article supplement (PMC8489729; doi:10.1371/journal.pcbi.1009439), 2021-09-22
Supplement: pcbi.1009439.s047.pdf [file pcbi.1009439.s047.pdf]

| Figure | Panels   | Dataset                | Model    | $ z_s $ | $ z_u $ | $ z_b $ | $\alpha$ | $\beta$ | $\gamma$ | $\delta$ |
|--------|----------|------------------------|----------|---------|---------|---------|----------|---------|----------|----------|
| 2      | A-H      | head-fixed mouse       | PS-VAE   | 4       | 2       | 0       | 1000     | 5       | 500      | -        |
| 2      | C-D      | head-fixed mouse       | VAE      | 0       | 6       | 0       | -        | 1       | -        | -        |
| 3      | B-E      | freely moving mouse    | PS-VAE   | 8       | 2       | 0       | 100      | 5       | 1000     | -        |
| 3      | B-C      | freely moving mouse    | VAE      | 0       | 10      | 0       | -        | 1       | -        | -        |
| 4      | B-E      | mouse face             | PS-VAE   | 3       | 2       | 0       | 1000     | 20      | 1000     | -        |
| 4      | B-C      | mouse face             | VAE      | 0       | 5       | 0       | -        | 1       | -        | -        |
| 5      | A-D      | mouse face             | PS-VAE   | 3       | 2       | 0       | 1000     | 20      | 1000     | -        |
| 5      | E-G      | mouse face             | VAE      | 0       | 5       | 0       | -        | 1       | -        | -        |
| 6      | B-C      | mouse face             | PS-VAE   | 3       | 2       | 0       | 1000     | 20      | 1000     | -        |
| 6      | D-E      | mouse face             | VAE      | 0       | 5       | 0       | -        | 1       | -        | -        |
| 7      | B-E      | two-view mouse         | PS-VAE   | 5       | 2       | 0       | 1000     | 1       | 1000     | -        |
| 7      | B-C      | two-view mouse         | VAE      | 0       | 7       | 0       | -        | 1       | -        | -        |
| 8      | A-C, E-F | two-view mouse         | PS-VAE   | 5       | 2       | 0       | 1000     | 1       | 1000     | -        |
| 8      | A, D-F   | two-view mouse         | VAE      | 0       | 7       | 0       | -        | 1       | -        | -        |
| 9      | A-B      | two-view mouse         | PS-VAE   | 5       | 2       | 0       | 1000     | 1       | 1000     | -        |
| 9      | C        | two-view mouse         | VAE      | 0       | 7       | 0       | -        | 1       | -        | -        |
| 10     | D-G      | multi head-fixed mouse | MSPS-VAE | 4       | 4       | 3       | 50       | 10      | -        | 50       |
| 10     | C        | multi head-fixed mouse | PS-VAE   | 4       | 7       | 0       | 50       | 10      | -*       | -        |
| 10     | B        | multi head-fixed mouse | VAE      | 0       | 11      | 0       | -        | 1       | -        | -        |
